# Supplementary material for: Increased risk of kidney failure in patients with genetic kidney disorders
Source: JCI journal article supplement (doi:10.1172/jci178573), 2024-09-02
Supplement: sd2 [file 2]

301 Moved Permanently

# Moved Permanently

The document has moved here.
